# Supplementary material for: Longitudinal hair cortisol in bipolar disorder and a mechanism based on HPA dynamics
Source: bioRxiv preprint, doi:10.1101/2023.07.03.546860, version 1 (2023-07-03)
Supplement: Supplementary Information [file 546860_file02.docx]

**Supplementary information**

**Estimation of hyper-reactivity prevalence**

We didn’t find a previous estimate for the prevalence of hyper-reactivity in the population. To estimate this prevalence we summarized the prevalences of all the pathological conditions that are well-associated with hyper-reactivity, which total to 38% (Supporting information, Table S1). We then accounted for comorbidities (Supporting information, Table S2) to find an estimated hyper-reactivity prevalence of 11%. This is an underestimate in the sense that we don't take into account individuals without pathology.

| **Disorder** | **Type of Hyperreactivity** | **Prevalence in Population** |
| --- | --- | --- |
| Bipolar1,2 | Emotional Reactivity General  problematic emotional-regulation goals | 1-2%3 |
| Borderline Personality1, 2 | the duration of emotion is both too long and too short | 1-3%4,5 |
| Social Anxiety Disorder2 | hyperreactivity to specific negative emotions | 12.1%6 |
| Major Depressive Disorder2 | both hyperreactivity and hyporeactivity | 4.7%7 |
| Specific Phobia2 | duration of negative emotion is too long | 7.2%8 |
| Intermittent Explosive Disorder2 | emotions occur too frequently | 0.8%9 |
| Autism Spectrum Disorder2 | emotions may occur both too frequently and too infrequently | 0.76%10 |
| ADHD2 | problematic emotional regulation strategies | 9.34%11 |

|  |
| --- |

**Table S1. Prevalence of hyper-reactivity-associated diseases**

|  | Bipolar | Borderline Personality | Social Anxiety Disorder | Major Depressive Disorder | Specific Phobia | Intermittent Explosive Disorder | Autism Spectrum Disorder | ADHD |
| --- | --- | --- | --- | --- | --- | --- | --- | --- |
| Bipolar |  | 10-20%12 | 13.3%13 |  | 66.6%14 | 6.5%15 | 1.4%16 | 10-21%17 |
| Borderline Personality | 20%12 |  | 42.418 | 49.119 - 61%18 | 20.318 |  | 3%20 | 16.1-38.1%21 |
| Social Anxiety Disorder | 3.5-21%22 |  |  | 35-70%22 | 14.1-60.822 |  |  | 60-70%22 |
| Major Depressive Disorder |  | 1.8-2523 | 20-30%22 |  | 13.5%24 | 17%25 |  | 34%26 |
| Specific Phobia |  |  | 6.7%27 | 40.7%28 |  |  |  |  |
| Intermittent Explosive Disorder | 6.9-8.429, 17.630 | 48.2%31 | 23.430 | 26.4%30,  19-22.3%29, 21.531 | 26.930 |  |  | 12.732 |
| Autism Spectrum Disorder | 6-40%33 | 4%20 | 20%34 | 37%34 | 14%35 | 16.67%36 |  | 38%37 |
| ADHD | 5-20%17 | 18-27%38 | 10-45% (*GAD)39 | 25%40 | 8.840 | 24.532 | 30%37 |  |

|  |
| --- |

**Table S2. Comorbidities between hyper-reactivity-associated diseases**

**Resources**

1. Berenbaum, H., Raghavan, C., Le, H.-N., Vernon, L. L. & Gomez, J. J. A taxonomy of emotional disturbances. *Clinical Psychology: Science and Practice* **10**, 206–226 (2003).

2. Gross, J. J. & Jazaieri, H. Emotion, Emotion Regulation, and Psychopathology: An Affective Science Perspective. *Clinical Psychological Science* **2**, 387–401 (2014).

3. Fagiolini, A. *et al.* Prevalence, chronicity, burden and borders of bipolar disorder. *J Affect Disord* **148**, 161–169 (2013).

4. Ellison, W. D., Rosenstein, L. K., Morgan, T. A. & Zimmerman, M. Community and Clinical Epidemiology of Borderline Personality Disorder. *Psychiatr Clin North Am* **41**, 561–573 (2018).

5. Guilé, J. M., Boissel, L., Alaux-Cantin, S. & de La Rivière, S. G. Borderline personality disorder in adolescents: prevalence, diagnosis, and treatment strategies. *Adolesc Health Med Ther* **9**, 199–210 (2018).

6. Stein, M. B. & Stein, D. J. Social anxiety disorder. *The Lancet* **371**, 1115–1125 (2008).

7. Ferrari, A. J. *et al.* Global variation in the prevalence and incidence of major depressive disorder: a systematic review of the epidemiological literature. *Psychol Med* **43**, 471–481 (2013).

8. Eaton, W. W., Bienvenu, O. J. & Miloyan, B. Specific phobias. *Lancet Psychiatry* **5**, 678–686 (2018).

9. Scott, K. M. *et al.* The cross-national epidemiology of DSM-IV intermittent explosive disorder. *Psychol Med* **46**, 3161–3172 (2016).

10. Hodges, H., Fealko, C. & Soares, N. Autism spectrum disorder: definition, epidemiology, causes, and clinical evaluation. *Transl Pediatr* **9**, S55–S65 (2020).

11. Song, P. *et al.* The prevalence of adult attention-deficit hyperactivity disorder: A global systematic review and meta-analysis. *J Glob Health* **11**, 04009 (2021).

12. Zimmerman, M. & Morgan, T. A. The relationship between borderline personality disorder and bipolar disorder. *Dialogues Clin Neurosci* **15**, 155–169 (2013).

13. Yapici Eser, H., Kacar, A. S., Kilciksiz, C. M., Yalçinay-Inan, M. & Ongur, D. Prevalence and Associated Features of Anxiety Disorder Comorbidity in Bipolar Disorder: A Meta-Analysis and Meta-Regression Study. *Front Psychiatry* **9**, 229 (2018).

14. McIntyre, R. S. *et al.* Anxiety disorders and bipolar disorder: a review. *Bipolar Disord* **8**, 665–676 (2006).

15. Karakus, G. & Tamam, L. Impulse control disorder comorbidity among patients with bipolar I disorder. *Compr Psychiatry* **52**, 378–385 (2011).

16. *Psychopathology in Adolescents and Adults with Autism Spectrum Disorders*. (Springer International Publishing, 2019). doi:10.1007/978-3-030-26276-1.

17. Asherson, P. *et al.* Differential diagnosis, comorbidity, and treatment of attention-deficit/hyperactivity disorder in relation to bipolar disorder or borderline personality disorder in adults. *Curr Med Res Opin* **30**, 1657–1672 (2014).

18. Zimmerman, M. & Mattia, J. I. Axis I diagnostic comorbidity and borderline personality disorder. *Compr Psychiatry* **40**, 245–252 (1999).

19. Ferrer, M. *et al.* Comorbid attention-deficit/hyperactivity disorder in borderline patients defines an impulsive subtype of borderline personality disorder. *J Pers Disord* **24**, 812–822 (2010).

20. May, T., Pilkington, P. D., Younan, R. & Williams, K. Overlap of autism spectrum disorder and borderline personality disorder: A systematic review and meta-analysis. *Autism Res* **14**, 2688–2710 (2021).

21. Comparelli, A., Polidori, L., Sarli, G., Pistollato, A. & Pompili, M. Differentiation and comorbidity of bipolar disorder and attention deficit and hyperactivity disorder in children, adolescents, and adults: A clinical and nosological perspective. *Front Psychiatry* **13**, 949375 (2022).

22. Koyuncu, A., İnce, E., Ertekin, E. & Tükel, R. Comorbidity in social anxiety disorder: diagnostic and therapeutic challenges. *Drugs Context* **8**, 212573 (2019).

23. Koenigsberg, H. W. *et al.* Relationship between depression and borderline personality disorder. *Depress Anxiety* **10**, 158–167 (1999).

24. Goes, F. S. *et al.* Co-morbid anxiety disorders in bipolar disorder and major depression: familial aggregation and clinical characteristics of co-morbid panic disorder, social phobia, specific phobia and obsessive-compulsive disorder. *Psychol Med* **42**, 1449–1459 (2012).

25. Lejoyeux, M., Arbaretaz, M., McLoughlin, M. & Adès, J. Impulse control disorders and depression. *J Nerv Ment Dis* **190**, 310–314 (2002).

26. Turgay, A. & Ansari, R. Major Depression with ADHD: In Children and Adolescents. *Psychiatry (Edgmont)* **3**, 20–32 (2006).

27. Salehi, M. *et al.* The Lifetime Prevalence, Risk Factors, and Co-Morbidities of Specific Phobia Among Pediatric Population: A Cross-Sectional National Survey. *Clinical Medicine Insights: Psychiatry* **13**, 117955732110705 (2022).

28. Choy, Y., Fyer, A. J. & Goodwin, R. D. Specific phobia and comorbid depression: a closer look at the National Comorbidity Survey data. *Compr Psychiatry* **48**, 132–136 (2007).

29. Coccaro, E. F. Psychiatric comorbidity in Intermittent Explosive Disorder. *J Psychiatr Res* **118**, 38–43 (2019).

30. Scott, K. M. *et al.* Intermittent explosive disorder subtypes in the general population: association with comorbidity, impairment and suicidality. *Epidemiol Psychiatr Sci* **29**, e138 (2020).

31. Coccaro, E. F., Shima, C. K. & Lee, R. J. Comorbidity of personality disorder with intermittent explosive disorder. *J Psychiatr Res* **106**, 15–21 (2018).

32. Radwan, K. & Coccaro, E. F. Comorbidity of disruptive behavior disorders and intermittent explosive disorder. *Child Adolesc Psychiatry Ment Health* **14**, 24 (2020).

33. Vannucchi, G., Perugi, G. & Masi, G. Bipolar Disorder and ASD. in *Psychopathology in Adolescents and Adults with Autism Spectrum Disorders* (ed. Keller, R.) 89–110 (Springer International Publishing, 2019). doi:10.1007/978-3-030-26276-1_7.

34. Hollocks, M. J., Lerh, J. W., Magiati, I., Meiser-Stedman, R. & Brugha, T. S. Anxiety and depression in adults with autism spectrum disorder: a systematic review and meta-analysis. *Psychol. Med.* **49**, 559–572 (2019).

35. Muskett, A., Radtke, S., White, S. & Ollendick, T. Autism Spectrum Disorder and Specific Phobia: the Role of Sensory Sensitivity: Brief Review. *Rev J Autism Dev Disord* **6**, 289–293 (2019).

36. Radwan, R. B. & Mallik, C. I. Psychiatric comorbidities with autism spectrum disorder in an adult clinic sample. *BJPsych open* **7**, S239–S239 (2021).

37. Stahlberg, O., Soderstrom, H., Rastam, M. & Gillberg, C. Bipolar disorder, schizophrenia, and other psychotic disorders in adults with childhood onset AD/HD and/or autism spectrum disorders. *J Neural Transm (Vienna)* **111**, 891–902 (2004).

38. O’Malley, G. K., McHugh, L., Mac Giollabhui, N. & Bramham, J. Characterizing adult attention-deficit/hyperactivity-disorder and comorbid borderline personality disorder: ADHD symptoms, psychopathology, cognitive functioning and psychosocial factors. *Eur Psychiatry* **31**, 29–36 (2016).

39. Sobanski, E. Psychiatric comorbidity in adults with attention-deficit/hyperactivity disorder (ADHD). *Eur Arch Psychiatry Clin Neurosci* **256**, i26–i31 (2006).

40. Fischer, A. G. *et al.* The role of comorbid major depressive disorder in the clinical presentation of adult ADHD. *J Psychiatr Res* **41**, 991–996 (2007).
